# Supplementary material
Source: publisher figshare collection journal article supplement (https://acs.figshare.com/ndownloader/files/5817276)
Supplement: Supplementary file 1 [file 5817276]

#### Terms & Conditions

Electronic Supporting Information files are available without a subscription to ACS Web Editions. The American Chemical Society holds a copyright ownership interest in any copyrightable Supporting Information. Files available from the ACS website may be downloaded for personal use only. Users are not otherwise permitted to reproduce, republish, redistribute, or sell any Supporting Information from the ACS website, either in whole or in part, in either machine-readable form or any other form without permission from the American Chemical Society. For permission to reproduce, republish and redistribute this material, requesters must process their own requests via the RightsLink permission system. Information about how to use the RightsLink permission system can be found at <http://pubs.acs.org/page/copyright/permissions.html>

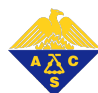

ACS Publications

MOST TRUSTED. MOST CITED. MOST READ.

Copyright © 1996 American Chemical Society

**REVISED**

DEC 15 1995

JP950833V

H-4484-1

Supplementary material.

JOURNAL OF PHYSICAL  
CHEMISTRY**Benzophenone-Initiated Photoisomerization of Norbornadiene Group in a Benzophenone-Steroid-Norbornadiene System via Long-Distance Intramolecular Triplet Energy Transfer**

Chen-Ho Tung\*, Li-Ping Zhang and Yi Li

Institute of Photographic Chemistry, Chinese Academy of Sciences, Beijing 100101, China

Hong Cao and Yoshifumi Tanimoto

Department of Chemistry, Faculty of Science, Hiroshima University, Kagamiyama, Higashi-Hiroshima, Japan 739

**3 $\beta$ -NBD-androst-5-en-17-one (NBD-S-One).** Bicyclo[2,2,1]hepta-2,5-diene-2-methylcarboxylate-3-carboxylic acid was prepared by literature method.<sup>1</sup> NBD-S-One was synthesized by esterification of bicyclo[2,2,1]hepta-2,5-diene-2-methylcarboxylate-3-carboxylyl chloride with 3 $\beta$ -hydroxy-androst-5-en-17-one. A 50 ml round bottom flask was equipped with a magnetic stir bar and a condenser with a nitrogen inlet tube. The apparatus was flame dried under dry nitrogen and charged with anhydrous bicyclo[2,2,1]hepta-2,5-diene-2-methylcarboxylate-3-carboxylic acid (0.9 g, 4.64 mmol) and thionyl chloride (5 ml). The mixture was refluxed for 3 h and the excess of thionyl chloride was removed under reduced pressure. The resulting bicyclo[2,2,1]hepta-2,5-diene-2-methylcarboxylate-3-carboxylyl chloride was dissolved in anhydrous tetrahydrofuran (5 ml), and to the solution was added first 3 $\beta$ -hydroxy-androst-5-en-17-one (1.3 g, 4.5 mmol) and then anhydrous triethylamine (0.2 ml). The mixture was refluxed overnight, at which time TLC analysis showed the complete disappearance of the alcohol. Water was then added, and the mixture was extracted with ether. The ether extract was washed successively with sodium bicarbonate solution (5%) and water. The organic layer was dried over MgSO<sub>4</sub>. Evaporation of the solvent afforded a yellow oily product. The product was purified by column chromatography on silica eluted with petroleum ether/diethyl ether (60/30, in volume) to give NBD-S-One as white crystals (0.2 g, 10%), mp 155-158 °C. Anal. Calcd for C<sub>29</sub>H<sub>36</sub>O<sub>5</sub>: C, 75.00; H, 7.75, Found: C, 75.48; H, 7.55. MS m/e 465(M<sup>+</sup>+1); IR (KBr) 2920 (C-H), 1720 (-COO), 1690 (-C=O), 1600 (-C=C), 1270 (-C-O); <sup>1</sup>HNMR (CDCl<sub>3</sub>, 300 MHz) 6.95 (dd, 1H, NBD olefinic H), 6.90 (dd, 1H, NBD olefinic H), 5.40 (dd, 1H, steroid olefinic H), 4.25 (m, 1H, NBD bridgehead H), 4.15 (m, 1H, NBD bridgehead H), 3.95 (s, 3H, O-CH<sub>3</sub>), 3.55 (m, 1H, 3 $\alpha$ -H), 2.55-2.05 (m, 2H, NBD bridge H) 2.4-1.1 (m, 19H), 1.05 (s, 3H, 19-CH<sub>3</sub>), 0.90 (s, 3H, 18-CH<sub>3</sub>).

H-4484-2

**3 $\beta$ -NBD-androst-5-en-17 $\beta$ -ol (NBD-S-17 $\beta$ -Ol) and 3 $\beta$ -NBD-androst-5-en-17 $\alpha$ -ol (NBD-S-17 $\alpha$ -Ol).** These compounds were prepared by reduction of NBD-S-One with sodium borohydride.<sup>2</sup> To a stirred solution of NBD-S-One (0.5 g, 1.08 mmol) in 10 ml of tetrahydrofuran at room temperature was added sodium borohydride (0.5 g, 13 mmol). The mixture was refluxed for 3 h, then was cooled and poured into 20 ml of 0.6 N HCl with ice. The mixture was extracted with diethyl ether. The organic layer was washed with water and dried over MgSO<sub>4</sub>. Evaporation of the solvent afforded the crude alcohols as yellow solid. These products were purified by silica gel chromatography (1:2 diethyl ether/petroleum ether as the eluant) to give a mixture of NBD-S-17 $\beta$ -Ol and NBD-S-17 $\alpha$ -Ol with a total yield of 0.35 g (70%). They were separated by TLC on silica with diethyl ether/petroleum ether (30:70) as the eluant. The ratio of NBD-S-17 $\beta$ -Ol to NBD-S-17 $\alpha$ -Ol was ca. 3:1. NBD-S-17 $\beta$ -Ol: mp 159-161 °C; Anal. Calcd for C<sub>29</sub>H<sub>38</sub>O<sub>5</sub>: C, 74.48; H, 8.20. Found: C, 74.20; H, 8.00. IR (KBr) 3570 (–O–H), 1720 (–COO), 1600 (–C=C), 1270 (–C–O); <sup>1</sup>HNMR (CDCl<sub>3</sub>, 300 MHz) 6.95 (dd, 1H, NBD olefinic H), 6.90 (dd, 1H, NBD olefinic H), 5.40 (dd, 1H, steroid olefinic H), 4.25 (m, 1H, NBD bridgehead H), 4.15 (m, 1H, NBD bridgehead H), 3.95 (s, 1H, O–CH<sub>3</sub>), 3.55 (m, 1H, 3 $\alpha$ -H), 3.32 (t, 1H, 17 $\alpha$ -H), 2.55-2.05 (m, 2H, NBD bridge H), 2.4-1.1 (m, 19H), 1.05 (s, 3H, 19-CH<sub>3</sub>), 0.90 (s, 3H, 18-CH<sub>3</sub>); NBD-S-17 $\alpha$ -Ol: <sup>1</sup>HNMR (CDCl<sub>3</sub>, 300 MHz) 6.95 (dd, 1H, NBD olefinic H), 6.90 (dd, 1H, NBD olefinic H), 5.40 (dd, 1H, steroid olefinic H), 4.25 (m, 1H, NBD bridgehead H), 4.15 (m, 1H, NBD bridgehead H), 3.95 (s, 3H, O–CH<sub>3</sub>), 3.68 (t, 1H, 17 $\beta$ -H), 3.55 (m, 1H, 3 $\alpha$ -H), 2.55-2.05 (m, 2H, NBD bridge H), 2.4-1.1 (m, 19H), 1.05 (s, 3H, 19-CH<sub>3</sub>), 0.90 (s, 3H, 18-CH<sub>3</sub>).

**3 $\beta$ -NBD-androst-5-en-BP (NBD-S-BP).** This compound was prepared by esterification of benzophenone-4-carboxyl chloride with NBD-S-17 $\beta$ -Ol using a procedure similar to that utilized for NBD-S-One. The product was purified by chromatography on silica with ethyl acetate/petroleum ether (1:2) as eluant to give 12.5% yield of NBD-S-BP as a solid, mp 178-180 °C, Anal. Calcd for C<sub>43</sub>H<sub>46</sub>O<sub>7</sub>: C, 76.55; H, 6.82; Found: C, 76.24; H, 6.55; MS m/e 675 (M<sup>+</sup>+1); IR (KBr) 2930 (C–H), 1720 (–COO), 1700 (–C=O), 1640 (phenyl), 1600 (–C=C), 1240 (–C–O); <sup>1</sup>HNMR (CDCl<sub>3</sub>, 300 Hz): 8.25-7.50 (m, 8H, arom.), 6.95 (dd, 1H, NBD olefinic H), 6.90 (dd, 1H, NBD olefinic H), 5.40 (dd, 1H, steroid olefinic H), 4.25 (m, 1H, NBD bridgehead H), 4.15 (m, 1H, NBD bridgehead H), 3.95 (s, 3H, O–CH<sub>3</sub>), 3.55 (m, 1H, 3 $\alpha$ -H), 3.35 (t, 1H, 17 $\alpha$ -H), 2.55-2.05 (m, 2H, NBD bridge H), 2.4-1.1 (m, 19H), 1.05 (s, 3H, 19-CH<sub>3</sub>), 0.90 (s, 3H, 18-CH<sub>3</sub>).

**3 $\beta$ -QC-androst-5-en-17 $\beta$ -BP (QC-S-BP).** A N<sub>2</sub>-saturated solution of NBD-S-BP (2.5 $\times$ 10<sup>–4</sup> M) in 200 ml acetonitrile was irradiated at  $\lambda$  > 350 nm at room temperature. The yield of the product was determined by <sup>1</sup>HNMR spectroscopic analysis of the crude reaction mixture and by HPLC analysis. The product was separated from the photolysed mixture by TLC with ethyl acetate/petroleum ether

H-4484-3

(1:2) as eluant. MS  $m/e$  675 ( $M^+ + 1$ ); IR (KBr), 2930 (C-H), 1720 (–COO), 1700 (–C=O), 1640 (phenyl), 1600 (–C=C), 1240 (–C–O);  $^1\text{HNMR}$  ( $\text{CDCl}_3$ , 300 MHz), 8.25–7.50 (m, 8H, arom.), 5.40 (dd, 1H, steroid olefinic H), 3.75 (s, 3H, O-CH<sub>3</sub>), 3.55 (m, 1H, 3 $\alpha$ -H), 3.35 (t, 1H, 17 $\alpha$ -H), 2.75–2.85 (m, 2H, QC bridgehead H), 2.55 (m, 2H, QC cyclobutane H), 2.35 (m, 2H, QC bridge H), 2.4–1.1 (m, 19H), 1.05 (s, 3H, 19-CH<sub>3</sub>), 0.90 (s, 3H, 18-CH<sub>3</sub>).

**3 $\beta$ -acetoxy-androst-5-en-17 $\beta$ -BP (A-S-BP).** This compound was synthesized by a method analogous to that of NBD-S-BP by using acetyl chloride as the starting material and was identified by element analysis, MS, IR and  $^1\text{HNMR}$  spectroscopies.

## References

1. (a) Blomquist, A. J.; Winslow, G. E., *J. Org. Chem.*, **1945**, *10*, 1990. (b) Rlder, K.; Brochagen, F., *Chem. Ber.*, **1954**, *87*, 167.
2. (a) Chinn, L. J. *J. Org. Chem.* **1965**, *30*, 4165. (b) Norymberski, J. K.; Woods, G. F. *J. Chem. Soc.* **1955**, 3426.
